# Supplementary material for: FAS receptor regulates NOTCH activity through ERK-JAG1 axis activation and controls oral cancer stemness ability and pulmonary metastasis
Source: PubMed Central journal article supplement (PMC8898312; doi:10.1038/s41420-022-00899-5), 2022-03-05
Supplement: 41420_2022_899_MOESM13_ESM.pdf [file 41420_2022_899_MOESM13_ESM.pdf]

**Important information. Please read.**

- This form should be used by authors to request any change in authorship (adding/deleting authors) including changes in corresponding authors. This form should not be used for name changes. Please fully complete all sections. Use black ink and block capitals and provide each author's full name with the given name first followed by the family name.
- By signing this declaration, all authors guarantee that the order of the authors are in accordance with their scientific contribution, if applicable as different conventions apply per discipline, and that only authors have been added who made a meaningful contribution to the work.
- Please note, in author collaborations where there is formal agreement for representing the collaboration, it is sufficient for the representative or legal guarantor (usually the corresponding author) to complete and sign the Authorship Change Form on behalf of all authors, **next to the added/removed author(s). (Complete Section 3, followed by Section 6.)**  
In author collaborations where there is no formal agreement for representing the collaboration and **there are more than 10 authors**, one may sign for all, provided the signer appends correspondence that attests that each of the authors have agreed to the change **and the added/removed authors sign the form. (Complete Section 3, followed by Section 6.)**
- Please note, we cannot investigate or mediate any authorship disputes. If you are unable to obtain agreement from all authors (including those who you wish to be removed) you must refer the matter to your institution(s) for investigation. Please inform us if you need to do this.
- If you are not able to return a fully completed form within **30 days** of the date that it was sent to the author requesting the change, we may have to withdraw your manuscript. We cannot publish manuscripts where authorship has not been agreed by all authors (including those who have been removed).
- Incomplete forms will be rejected.
- Please return/upload this form, fully completed, to the Journals Editorial Office. The Journal and/or Publisher will consider the information you have provided to decide whether to approve the proposed change in authorship. We may decide to contact your institution for more information or undertake a further investigation, if appropriate, before making a final decision.

**Section 1: Please provide the current title of manuscript**

**Manuscript ID no.:** CDDISCOVERY-21-1958R2

**Title:** FAS Receptor Regulates NOTCH Activity through ERK-JAG1 Axis Activation and Controls Oral Cancer Stemness Ability and Pulmonary Metastasis

**Section 2: Please provide the previous authorship, in the order shown on the manuscript before the changes were introduced. Please indicate the corresponding author by adding (CA) behind the name.**

|                         | First name(s)      | Family name | ORCID or SCOPUS id, if available |
|-------------------------|--------------------|-------------|----------------------------------|
| 1 <sup>st</sup> author  | Wei-Min            | Chang       |                                  |
| 2 <sup>nd</sup> author  | Li-Jie             | Li          |                                  |
| 3 <sup>rd</sup> author  | Chien-Hsiu         | Li          | 0000-0002-4648-3744              |
| 4 <sup>th</sup> author  | Yu-Chan            | Chang       |                                  |
| 5 <sup>th</sup> author  | Tsung-Ching        | Lai         |                                  |
| 6 <sup>th</sup> author  | Chia-Yi            | Su          |                                  |
| 7 <sup>th</sup> author  | Chi-Long           | Chen        |                                  |
| 8 <sup>th</sup> author  | Peter Mu-Hsin (CA) |             |                                  |
| 9 <sup>th</sup> author  | Michael (CA)       | Hsiao       | 0000-0001-8529-9213              |
| 10 <sup>th</sup> author |                    |             |                                  |

Please use an additional sheet if there are more than 10 authors.

**Section 3: Please provide a justification for change. Please use this section to explain your reasons for changing the authorship of your manuscript, e.g. what necessitated the change in authorship? Please refer to the (journal) policy pages for more information about authorship. Please explain why omitted authors were not originally included and/or why authors were removed on the submitted manuscript.**

We added Sheng-Wei Feng due to his contribution in revision.  
 He, as a study supervisor, provided valuable suggestions and assisted in collaboration with authors and answering some queries raised by reviewers.

**Section 4: Proposed new authorship. Please provide your new authorship list in the order you would like it to appear on the manuscript. Please indicate the corresponding author by adding (CA) behind the name. If the Corresponding Author has changed, please indicate the reason under section 3.**

|                         | First name(s)  | Family name (this name will appear in full on the final publication and will be searchable in various abstract and indexing databases) | Affiliated institute                                                                                                                                                                                            | E-mail address            |
|-------------------------|----------------|----------------------------------------------------------------------------------------------------------------------------------------|-----------------------------------------------------------------------------------------------------------------------------------------------------------------------------------------------------------------|---------------------------|
| 1 <sup>st</sup> author  | Li-Jie         | Li 1,2                                                                                                                                 | 1 Ph.D. Program of School of Dentistry, College of Oral Medicine, Taipei Medical University, Taipei, Taiwan<br>2 Genomics Research Center, Academia Sinica, Taipei, Taiwan                                      | xu3xu4ru56lily@gmail.com  |
| 2 <sup>nd</sup> author  | Peter Mu-Hsin  | Chang 3,4,5                                                                                                                            | 3 Department of Oncology, Taipei Veterans General Hospital, Taipei, Taiwan<br>4 Faculty of Medicine, College of Medicine, National Yang Ming Chiao Tung University, Taipei, Taiwan                              | i54821413@yahoo.com.tw    |
| 3 <sup>rd</sup> author  | Chien-Hsiu     | Li 2                                                                                                                                   | 5 Institute of Biopharmaceutical Sciences, National Yang Ming Chiao Tung University, Taipei, Taiwan                                                                                                             | dicknivek@icloud.com      |
| 4 <sup>th</sup> author  | Yu-Chan        | Chang 6                                                                                                                                | 6 Department of Biomedical Imaging and Radiological Sciences, National Yang Ming Chiao Tung University, Taipei, Taiwan                                                                                          | jameskobe0@gmail.com      |
| 5 <sup>th</sup> author  | Tsung-Ching    | Lai 2,7                                                                                                                                | 7 Division of Pulmonary Medicine, Department of Internal Medicine, Wan Fang Hospital, Taipei Medical University, Taipei<br>8 Department of Biomedical Engineering, Johns Hopkins University, Baltimore, MD, USA | chuching0305@gmail.com    |
| 6 <sup>th</sup> author  | Chia-Yi        | Su 2,8                                                                                                                                 | 9 Department of Pathology, College of Medicine, Taipei Medical University, Taipei, Taiwan<br>10 Department of Pathology, Taipei Medical University Hospital, Taipei Medical University, Taipei, Taiwan.         | joysuforlab@gmail.com     |
| 7 <sup>th</sup> author  | Chi-Long       | Chen 9,10                                                                                                                              | 11 School of Oral Hygiene, College of Oral Medicine, Taipei Medical University, Taipei, Taiwan                                                                                                                  | chencl@tmu.edu.tw         |
| 8 <sup>th</sup> author  | Wei-Min (CA)   | Chang 2, 11                                                                                                                            | 12 Department of Biochemistry, Kaohsiung Medical University, Kaohsiung, Taiwan                                                                                                                                  | weiminchang@tmu.edu.tw    |
| 9 <sup>th</sup> author  | Michael (CA)   | Hsiao 2,12,13                                                                                                                          | 13 Ph.D. Program of Translational Medicine, Taipei Medical University, Taipei, Taiwan                                                                                                                           | mhsiao@gate.sinica.edu.tw |
| 10 <sup>th</sup> author | Sheng-Wei (CA) | Feng 14,15                                                                                                                             | 14 School of Dentistry, College of Oral Medicine, Taipei Medical University, Taipei, Taiwan<br>15 Division of Prosthodontics, Department of Dentistry, Taipei Medical University Hospital, Taipei, Taiwan       | shengwei@tmu.edu.tw       |

Please use an additional sheet if there are more than 10 authors.

**Section 5: Author contribution, Acknowledgement and Disclosures.** Please use this section to provide a new disclosure statement and, if appropriate, acknowledge any contributors who have been removed as authors and ensure you state what contribution any new authors made (if applicable per the journal or book (series) policy). **Please ensure these are updated in your manuscript - after approval of the change(s) - as our production department will not transfer the information in this form to your manuscript.**

**New acknowledgements:**

The authors would like to acknowledge the great help and assistance of Experimental Animal Imaging and Molecular Pathology Core Facilities and RNAi Core facility of Genomic Research Center, Academia Sinica (Taipei, Taiwan).

**New Disclosures (financial and non-financial interests, funding):**

**Consent for publication**

All authors approved to publish the study in this journal.

**Funding**

The study was financially supported by the Academia Sinica [AS-SUMMIT-108] to Michael Hsiao and MOST 107-2627-M-075 -001 to Peter Mu-Hsin Chang and financial support by Taipei Medical University [TMU108-AE1-B52] to Wei-Min Chang

**New Author Contributions statement (if applicable per the journal policy):**

**Conception and design:** L. J. Li, P.M.H. Chang, W.M. Chang, and M. Hsiao and S.W. Feng

**Development of methodology:** L.J Li, Y.C. Chang, T.C. Lai, W.M. Chang, and M. Hsiao

**Acquisition of data (provided animals, acquired and managed patients, provided facilities, etc.):** C. L. Chen and M. Hsiao

**Analysis and interpretation of data (e.g., statistical analysis, biostatistics, computational analysis):** L. J. Li, P.M.H. Chang, C. H. Li, Y. C. Chang, T. C. Lai, and C. Y. Su

**Writing, review, and/or revision of the manuscript:** L. J. Li, P.M.H. Chang, C. H. Li, Y. C. Chang, T. C. Lai, and C. Y. Su, W.M. Chang, and M. Hsiao and S.W. Feng

**Administrative, technical, or material support (i.e., reporting or organizing data, constructing databases):** P.M.H. Chang, Y. C. Chang, W.M. Chang, and M. Hsiao and S.W. Feng

**Study supervision:** W.M. Chang, and M. Hsiao and S.W. Feng

State 'Not applicable' if there are no new authors.

**Section 6: Declaration of agreement. All authors, unchanged, new and removed *must* sign this declaration.**

(NB: Please print the form, (docu)-sign and return/upload a scanned copy. Please note that signatures that have been inserted as an image file are acceptable as long as it is handwritten. Typed names in the signature box are unacceptable.) \* Please delete as appropriate. Delete all of the bold if you were on the original authorship list and are remaining as an author.

|                         | First name    | Family name |                                                                                                                                                                               | Signature        | Date         |
|-------------------------|---------------|-------------|-------------------------------------------------------------------------------------------------------------------------------------------------------------------------------|------------------|--------------|
| 1 <sup>st</sup> author  | Li-Jie        | Li          | I agree to the proposed new authorship shown in section 4 /and the <b>addition/removal*of my name to the authorship list</b> /and the proposed change in corresponding author | LI, LI-JIE       | 2022.02.09   |
| 2 <sup>nd</sup> author  | Peter Mu-Hsin | Chang       | I agree to the proposed new authorship shown in section 4 /and the <b>addition/removal*of my name to the authorship list</b> /and the proposed change in corresponding author | P. Mu-Hsin Chang | 2022.02.10   |
| 3 <sup>rd</sup> author  | Chien-Hsiu    | Li          | I agree to the proposed new authorship shown in section 4 /and the <b>addition/removal*of my name to the authorship list</b> /and the proposed change in corresponding author | Chien - Hsiu Li  | 2022.02.10   |
| 4 <sup>th</sup> authors | Yu-Chan       | Chang       | I agree to the proposed new authorship shown in section 4 /and the <b>addition/removal*of my name to the authorship list</b> /and the proposed change in corresponding author | Yu-Chan Chang    | 2/9/2022     |
| 5 <sup>th</sup> author  | Tsung-Ching   | Lai         | I agree to the proposed new authorship shown in section 4 /and the <b>addition/removal*of my name to the authorship list</b> /and the proposed change in corresponding author | Lai, Tsung-Ching | 2022.2.10    |
| 6 <sup>th</sup> author  | Chia-Yi       | Su          | I agree to the proposed new authorship shown in section 4 /and the <b>addition/removal*of my name to the authorship list</b> /and the proposed change in corresponding author | Chia-Yi Su       | Feb 09, 2022 |
| 7 <sup>th</sup> author  | Chi-Long      | Chen        | I agree to the proposed new authorship shown in section 4 /and the <b>addition/removal*of my name to the authorship list</b> /and the proposed change in corresponding author | Chi-Long Chen    | 2022.02.10   |

|                         | First name | Family name |                                                                                                                                                                               | Signature      | Date       |
|-------------------------|------------|-------------|-------------------------------------------------------------------------------------------------------------------------------------------------------------------------------|----------------|------------|
| 8 <sup>th</sup> author  | Wei-Min    | Chang       | I agree to the proposed new authorship shown in section 4 /and the <b>addition/removal*of my name to the authorship list</b> /and the proposed change in corresponding author | Wei-Min Chang  | 2.10.2022  |
| 9 <sup>th</sup> author  | Michael    | Hsiao       | I agree to the proposed new authorship shown in section 4 /and the <b>addition/removal*of my name to the authorship list</b> /and the proposed change in corresponding author | Michael Hsiao  | 2/10/2022  |
| 10 <sup>th</sup> author | Sheng-Wei  | Feng        | I agree to the proposed new authorship shown in section 4 /and the <b>addition/removal*of my name to the authorship list</b> /and the proposed change in corresponding author | Sheng-Wei Feng | 2022,02,10 |

Please use an additional sheet if there are more than 10 authors.

**In case of author collaborations with formal agreement:**

|                                | Name of consortium/consortia | First name | Family name |                                                                                                                                                                               | Signature | Date |
|--------------------------------|------------------------------|------------|-------------|-------------------------------------------------------------------------------------------------------------------------------------------------------------------------------|-----------|------|
| Representative/legal guarantor |                              |            |             | I agree to the proposed new authorship shown in section 4 /and the <b>addition/removal*of my name to the authorship list</b> /and the proposed change in corresponding author |           |      |

Both added/removed authors should complete the information in the first table under Section 6.

---- End of form ----
